# Supplementary material for: pH-Responsive Polyketone/5,10,15,20-Tetrakis-(Sulfonatophenyl)Porphyrin Supramolecular Submicron Colloidal Structures
Source: MDPI journal article supplement (doi:10.3390/polym12092017), 2020-09-03
Supplement: s1 [file s1]

Article

# pH-Responsive Polyketone/5,10,15,20-Tetrakis-(Sulfonatophenyl)Porphyrin Supramolecular Submicron Colloidal Structures

Esteban Araya-Hermosilla <sup>1,\*</sup>, Ignacio Moreno-Villoslada <sup>2,\*</sup>, Rodrigo Araya-Hermosilla <sup>3</sup>, Mario E. Flores <sup>2</sup>, Patrizio Raffa <sup>4</sup>, Tarita Biver <sup>5</sup>, Andrea Pucci <sup>6</sup>, Francesco Picchioni <sup>4</sup> and Virgilio Mattoli <sup>1,\*</sup>

<sup>1</sup> Center for Micro-BioRobotics, Istituto Italiano di Tecnologia Viale Rinaldo Piaggio 34, 56025 Pontedera (PI), Italy

<sup>2</sup> Laboratorio de Polímeros, Instituto de Ciencias Químicas, Facultad de Ciencias, Universidad Austral de Chile, Valdivia 5090000, Chile; [mario.flores@uach.cl](mailto:mario.flores@uach.cl)

<sup>3</sup> Programa Institucional de Fomento a la Investigación, Desarrollo e Innovación, Universidad Tecnológica Metropolitana, Ignacio Valdivieso 2409, P.O. Box 8940577, San Joaquín, Santiago 8940000, Chile; [rodrigo.araya@utem.cl](mailto:rodrigo.araya@utem.cl)

<sup>4</sup> Department of Chemical Product Engineering, ENTEG, University of Groningen, Nijenborgh 4, 9747AG Groningen, The Netherlands; [p.raffa@rug.nl](mailto:p.raffa@rug.nl) (P.R.); [f.picchioni@rug.nl](mailto:f.picchioni@rug.nl) (F.P.)

<sup>5</sup> Dipartimento di Farmacia, Università di Pisa, Via Bonanno 6, 56126 Pisa, Italy; [tarita.biver@unipi.it](mailto:tarita.biver@unipi.it)

<sup>6</sup> Dipartimento di Chimica e Chimica Industriale, Università di Pisa, Via Moruzzi 13, 56124 Pisa, Italy; [andrea.pucci@unipi.it](mailto:andrea.pucci@unipi.it)

\* Correspondence: [esteban.araya@iit.it](mailto:esteban.araya@iit.it) (E.A.-H.); [imorenovilloslada@uach.cl](mailto:imorenovilloslada@uach.cl) (I.M.-V.); [virgilio.mattoli@iit.it](mailto:virgilio.mattoli@iit.it) (V.M.); Tel.: +39-050-883417 (E.A.-H.); +56-(63)-2293520 (I.M.-V.); +39-050-883417 (V.M.)

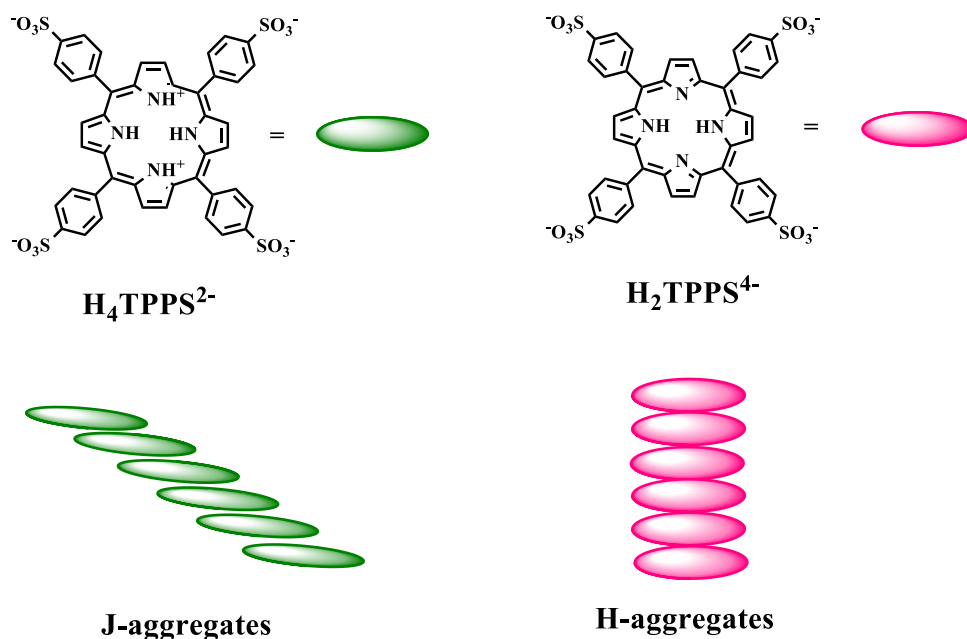

**Figure S1.** Schematic structure of J-aggregates (left) and H-aggregates (right) formed by TPPS.

### Section S1: Model compound synthesis

As described previously by our group [1], a model compound was synthesized and used as a reference to characterize the complex structure of the polymer. The model compound system was synthesized by mixing a one to one ratio between 2,5-hexadione and HEDA in a round bottom flask provided with a magnetic stirrer and reflux. The reaction was set under vigorous stirring at 100 °C for 4 h using a Heat-On™ Block System. The product was analyzed by <sup>1</sup>H NMR (Varian Mercury Plus 400 MHz spectrometer) using CDCl<sub>3</sub> as solvent. δ = 2.2 ppm (s, 6 H), 2.7 ppm (t, 2H, J = 6.9 Hz), 2.9 ppm (t, 2H, J = 6.9 Hz), 3.6 ppm (t, 2H, J = 6.9 Hz), 3.9 ppm (t, 2H, J = 6.9 Hz), 5.8 ppm (s, 2H).

### Section S2: Polyketone modification

The PK was preheated to the liquid state at 100 °C for a few min. Then, HEDA was added dropwise to the reactor in the first 30 min. The stirring speed was set at 400 rpm during 4 h. During the reaction, the color of the reaction mixture changed progressively from light yellow to a range of brown due to pyrrole formation as polymer backbone. The product was cooled down to room temperature and dissolved in chloroform for purification by the solvent/solvent extraction technique using brine as co-solvent. The process was repeated three times to remove unreacted amine molecules. The resulting polymer solution was dried at reduced pressure and transferred to a vacuum oven at 50 °C for 24 h for complete dryness. To avoid hydration, the samples were sealed in brown glass vials and stored at 6 °C for further characterization. Finally, the polymers were analyzed by <sup>1</sup>H-NMR and ATR-FT-IR. The carbonyl conversion was defined as the molar fraction of 1,4-dicarbonyl units converted via the Paal-Knorr reaction (*x*). It was calculated by elemental analysis EA (Elementar Vario Micro Cube) as follows.

$$x = \frac{NM_c}{nM_N + N(M_c - M_p)} \quad (1)$$

where *N* is the nitrogen content per g, *M<sub>N</sub>* represents the atomic mass of nitrogen (14 g/mol), *n* is the number of nitrogen atoms of the converted 1,4-dicarbonyl segment (2 units for HEDA), *M<sub>p</sub>* is the molecular weight of the converted 1,4-dicarbonyl segment (194 g/mol for HEDA), and *M<sub>c</sub>* is the molecular weight of the non-converted 1,4-dicarbonyl segment (126 g/mol) of PK. *M<sub>p</sub>* and *M<sub>c</sub>* were calculated taking into account the incorporation of ethylene and propylene in the copolymers at a ratio of 1:1.

In order to adjust the stoichiometry of the functional groups, a polymer molecular weight (PMW) of 236 g/mol of aliphatic amino groups (or hydroxyl groups) was considered, related with *x* of 0.74. This is calculated by the following formula.

$$PMW = \frac{xM_p + yM_c}{x} \quad (2)$$

where *y* is the fraction of non-converted 1,4-dicarbonyl groups, provided by *x* + *y* = 1.

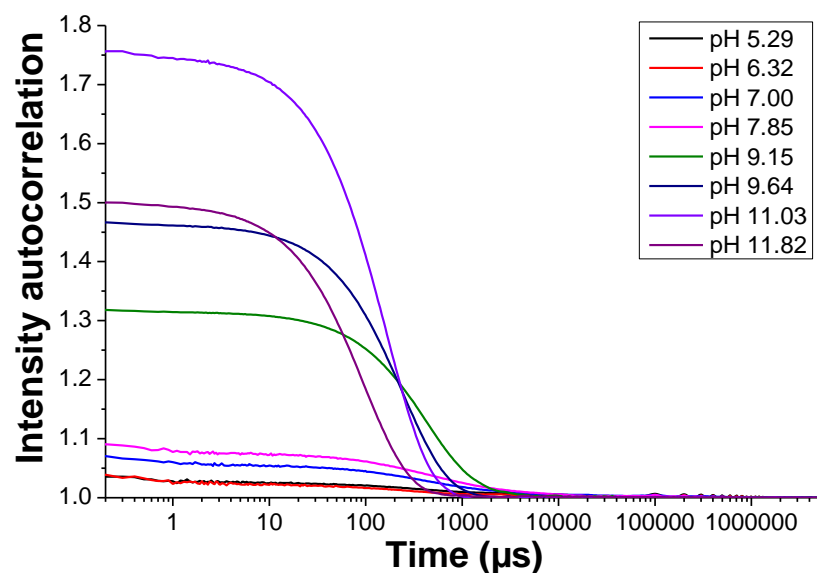

**Figure S2.** Correlograms of the PKHEDA ( $1 \times 10^{-4}$  M) polymeric suspensions.

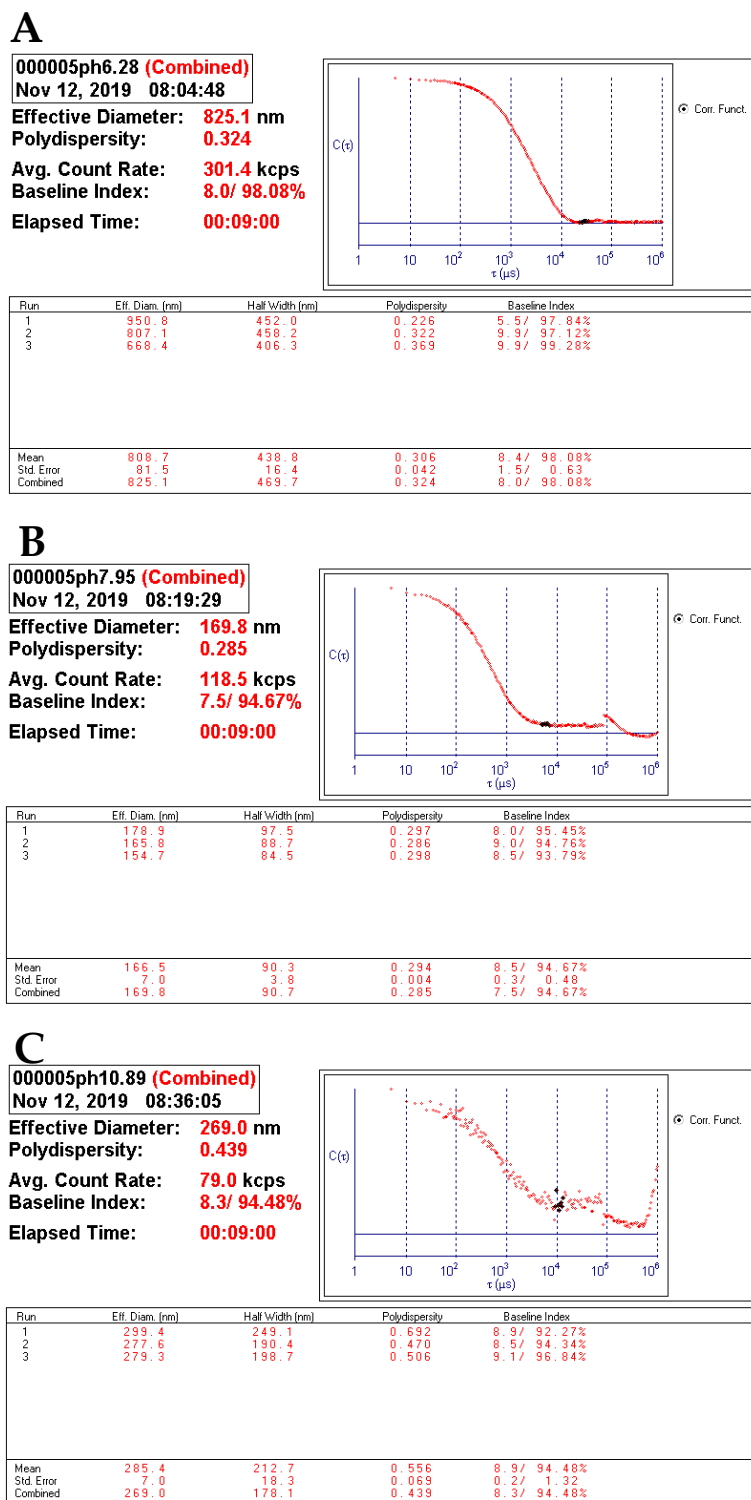

**Figure S3.** Size analysis report of the PKHEDA ( $1 \times 10^{-4}$  M)/ TPPS ( $5 \times 10^{-5}$ ) system at different pHs (A) 6.28, (B) 7.95, (C) 10.89.

**A****0.0001ph6.26 (Combined)****Nov 4, 2019 13:38:27****Effective Diameter: 317.9 nm****Polydispersity: 0.316****Avg. Count Rate: 375.2 kcps****Baseline Index: 9.1/ 98.24%****Elapsed Time: 00:09:00**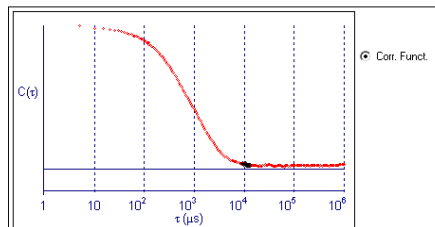

| Run        | Eff. Diam. (nm) | Half Width (nm) | Polydispersity | Baseline Index |
|------------|-----------------|-----------------|----------------|----------------|
| 1          | 306.8           | 176.9           | 0.332          | 9.9/ 98.56%    |
| 2          | 322.1           | 176.6           | 0.301          | 9.8/ 96.88%    |
| 3          | 323.8           | 183.4           | 0.321          | 8.9/ 99.28%    |
| Mean       | 317.6           | 178.9           | 0.318          | 9.5/ 98.24%    |
| Std. Error | 5.4             | 2.2             | 0.009          | 0.3/ 0.71      |
| Combined   | 317.9           | 178.8           | 0.316          | 9.1/ 98.24%    |

**B****0.0001ph7.85 (Combined)****Nov 4, 2019 13:54:15****Effective Diameter: 159.4 nm****Polydispersity: 0.303****Avg. Count Rate: 169.2 kcps****Baseline Index: 9.2/ 93.18%****Elapsed Time: 00:09:00**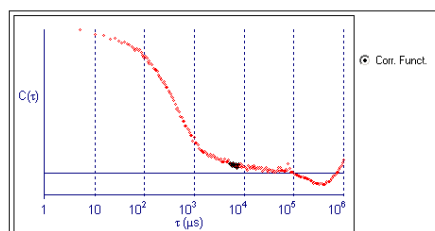

| Run        | Eff. Diam. (nm) | Half Width (nm) | Polydispersity | Baseline Index |
|------------|-----------------|-----------------|----------------|----------------|
| 1          | 161.9           | 97.4            | 0.352          | 9.3/ 94.84%    |
| 2          | 158.6           | 88.9            | 0.314          | 8.8/ 93.86%    |
| 3          | 148.1           | 87.5            | 0.349          | 9.5/ 90.84%    |
| Mean       | 156.2           | 91.3            | 0.342          | 9.2/ 93.18%    |
| Std. Error | 4.2             | 3.1             | 0.014          | 0.2/ 1.20      |
| Combined   | 159.4           | 87.8            | 0.303          | 9.2/ 93.18%    |

**C****0.0001ph11.13 (Combined)****Nov 4, 2019 14:14:01****Effective Diameter: 233.7 nm****Polydispersity: 0.419****Avg. Count Rate: 125.1 kcps****Baseline Index: 9.1/ 93.04%****Elapsed Time: 00:09:00**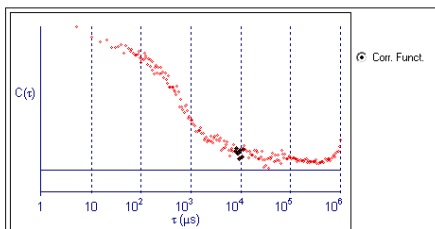

| Run        | Eff. Diam. (nm) | Half Width (nm) | Polydispersity | Baseline Index |
|------------|-----------------|-----------------|----------------|----------------|
| 1          | 245.7           | 184.8           | 0.450          | 8.8/ 95.32%    |
| 2          | 230.2           | 163.6           | 0.505          | 9.3/ 91.72%    |
| 3          | 212.8           | 147.7           | 0.482          | 9.2/ 92.10%    |
| Mean       | 229.6           | 158.7           | 0.479          | 9.1/ 93.04%    |
| Std. Error | 9.5             | 5.5             | 0.016          | 0.2/ 1.14      |
| Combined   | 233.7           | 151.3           | 0.419          | 9.1/ 93.04%    |

**Figure S4.** Size analysis report of the PKHEDA ( $1 \times 10^{-4}$  M)/TPPS ( $1 \times 10^{-4}$ ) system at different pHs (A) 6.26, (B) 7.85, (C) 11.13.

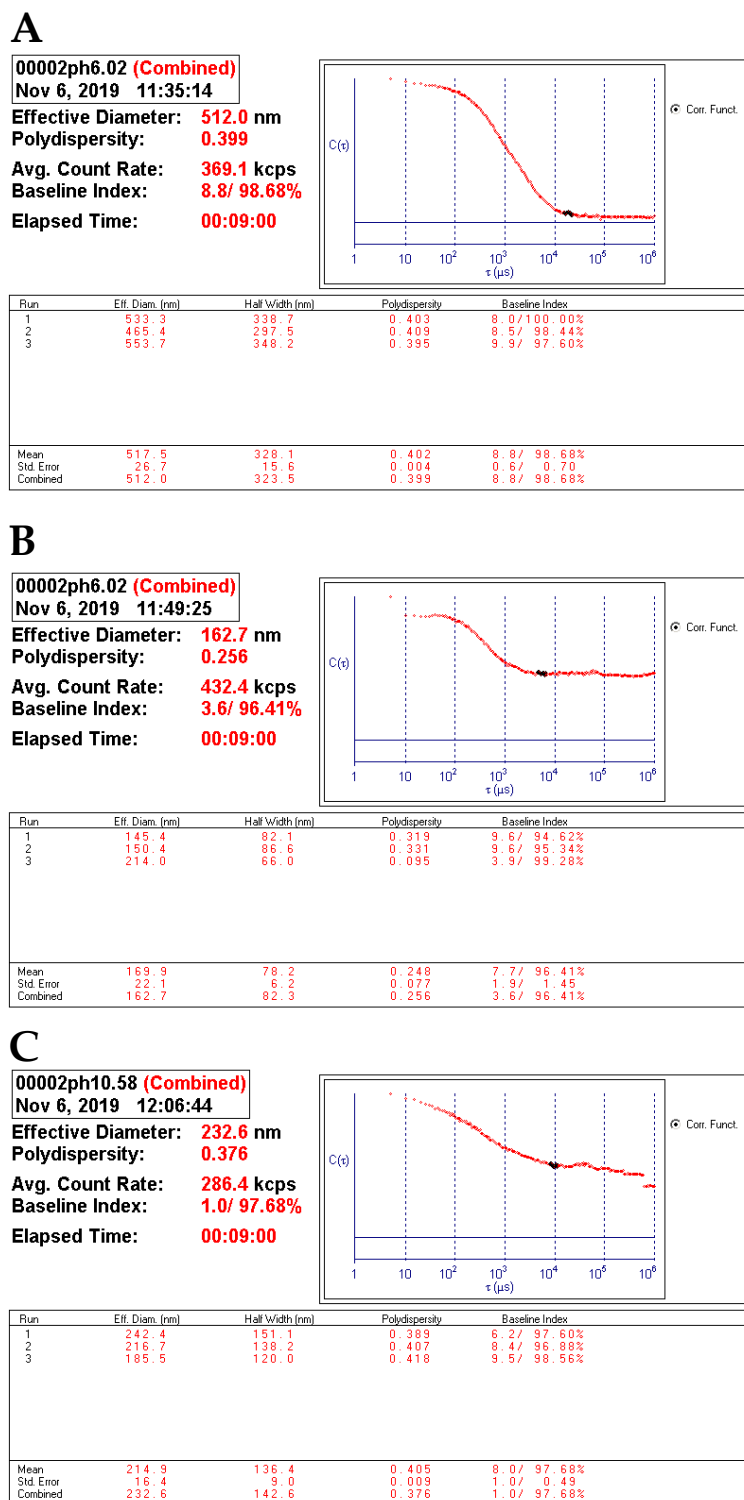

**Figure S5.** Size analysis report of the PKHEDA ( $1 \times 10^{-4}$  M)/TPPS ( $2 \times 10^{-4}$ ) system at different pHs (A) 6.02, (B) 7.56, (C) 10.58.

**Table S1.** Ultrafiltration experimental conditions

| Concentration PKHEDA (M functional groups) | Concentration TPPS (M) | pH    | Solution (mL) |
|--------------------------------------------|------------------------|-------|---------------|
| $1 \times 10^{-4}$                         | $5 \times 10^{-5}$     | 2.57  | 10            |
| $1 \times 10^{-4}$                         | $5 \times 10^{-5}$     | 4.07  | 10            |
| $1 \times 10^{-4}$                         | $5 \times 10^{-5}$     | 6.28  | 10            |
| $1 \times 10^{-4}$                         | $5 \times 10^{-5}$     | 7.95  | 10            |
| $1 \times 10^{-4}$                         | $5 \times 10^{-5}$     | 10.89 | 10            |
| $1 \times 10^{-4}$                         | $1 \times 10^{-4}$     | 2.33  | 10            |
| $1 \times 10^{-4}$                         | $1 \times 10^{-4}$     | 3.72  | 10            |
| $1 \times 10^{-4}$                         | $1 \times 10^{-4}$     | 6.26  | 10            |
| $1 \times 10^{-4}$                         | $1 \times 10^{-4}$     | 7.85  | 10            |
| $1 \times 10^{-4}$                         | $1 \times 10^{-4}$     | 11.13 | 10            |
| $1 \times 10^{-4}$                         | $2 \times 10^{-4}$     | 2.55  | 10            |
| $1 \times 10^{-4}$                         | $2 \times 10^{-4}$     | 4.66  | 10            |
| $1 \times 10^{-4}$                         | $2 \times 10^{-4}$     | 6.02  | 10            |
| $1 \times 10^{-4}$                         | $2 \times 10^{-4}$     | 7.56  | 10            |
| $1 \times 10^{-4}$                         | $2 \times 10^{-4}$     | 10.58 | 10            |

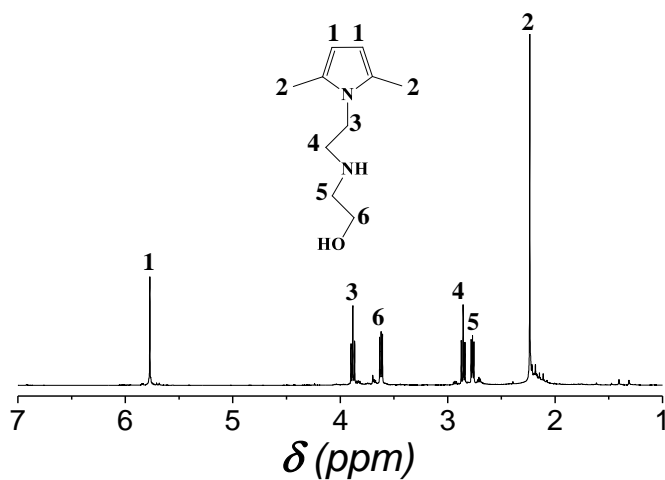**Figure S6.** <sup>1</sup>H-NMR spectrum of pyrrol-HEDA model compound used as reference to assign the peaks to the polymer.

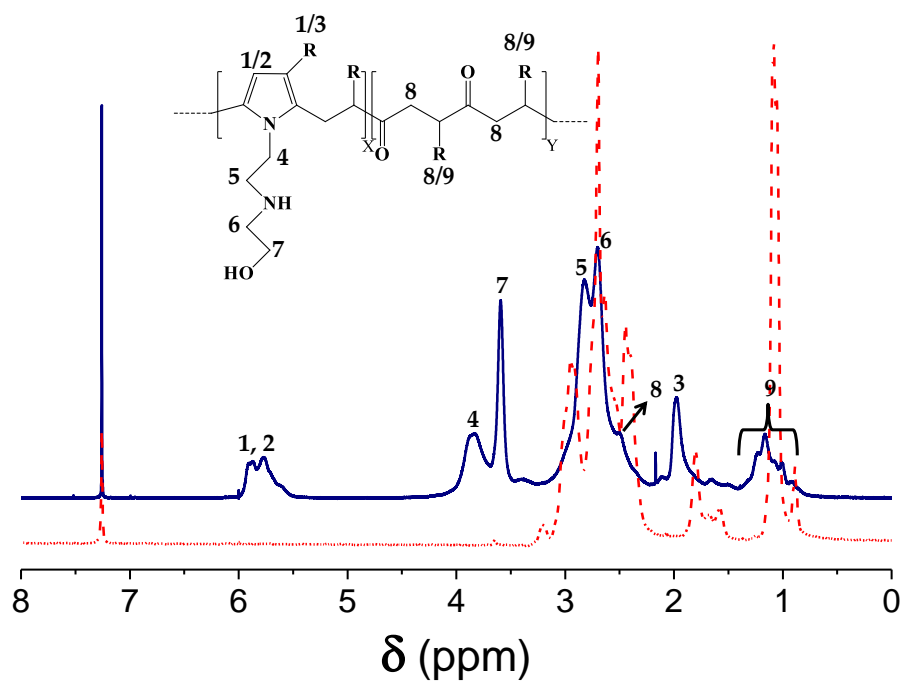

**Figure S7.**  $^1\text{H}$  NMR spectra of PK before (red dashed line) and after (solid black line) modification with HEDA

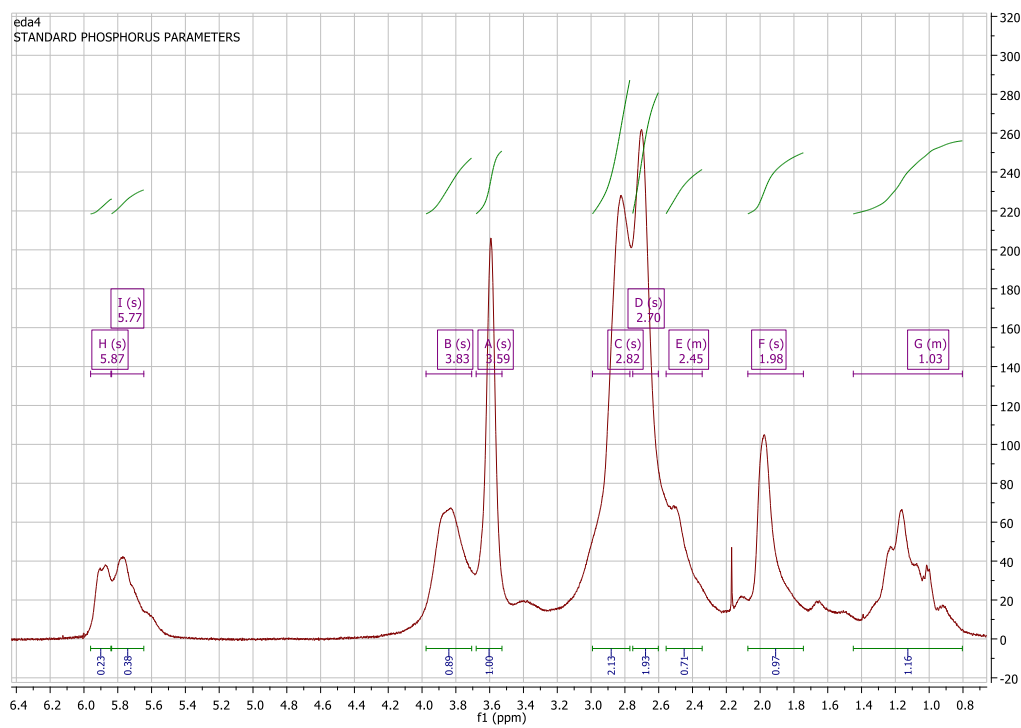

**Figure S8.**  $^1\text{H}$  NMR spectrum of PK functionalized with HEDA and its respective integrals.



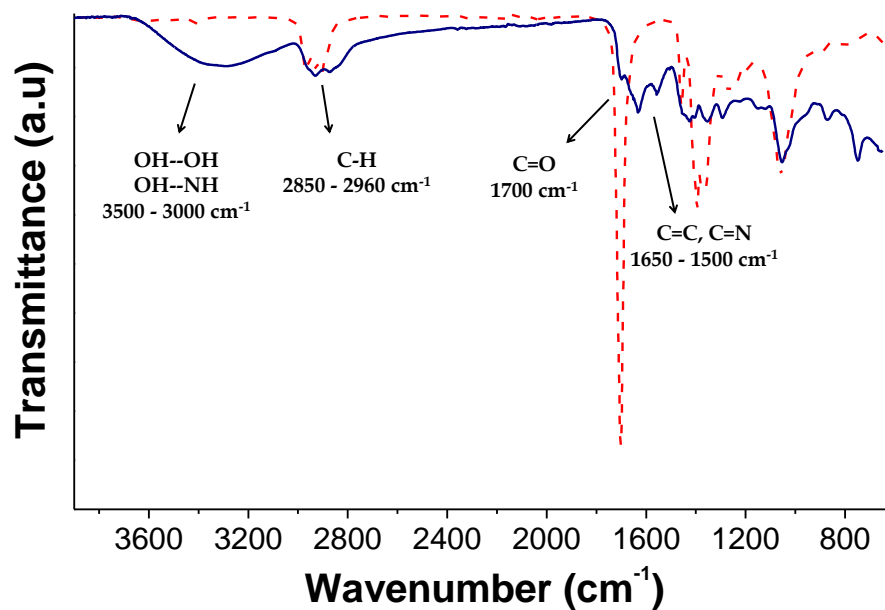

**Figure S9.** ATR-FTIR spectra of PK before (red dashed line) and after (solid blue line) modification with HEDA. Notice the hydrogen bonding peak-band around 3300  $\text{cm}^{-1}$

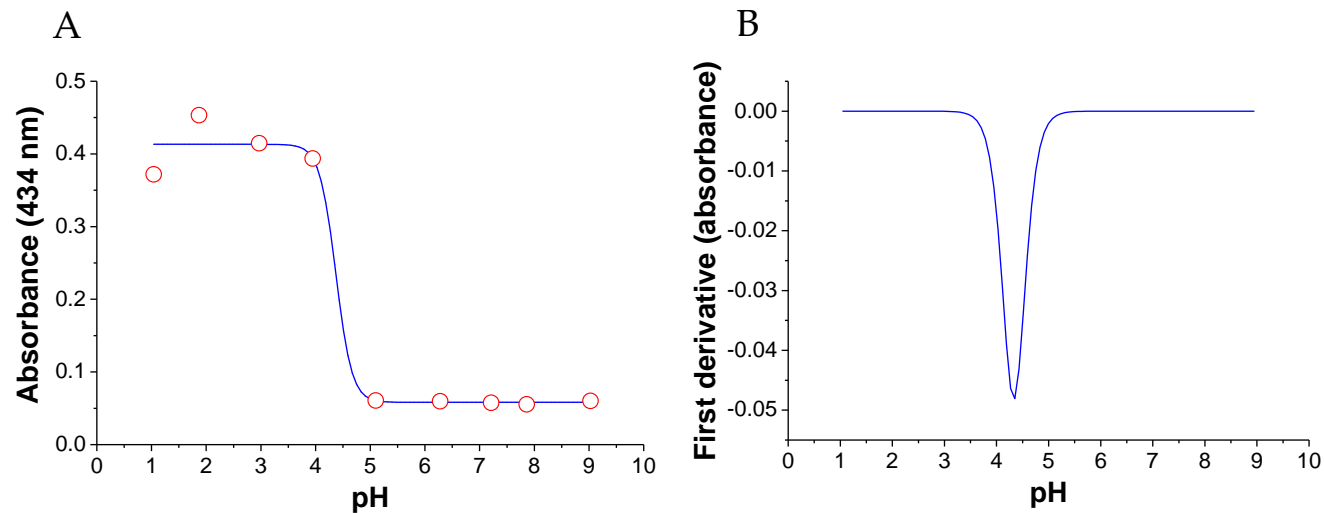

**Figure S10.** (A) Transition pH of TPPS at a concentration of  $1 \times 10^{-6}$  M. The absorbance of the TPPS band at 434 nm was used to estimate the transition pH in a range of pH from 1 to 9 that reveals the protonation of the pyrrole groups. (B) Fitting data using the Boltzmann sigmoidal curve and further derivation to find the transition pH of TPPS at 4.35.

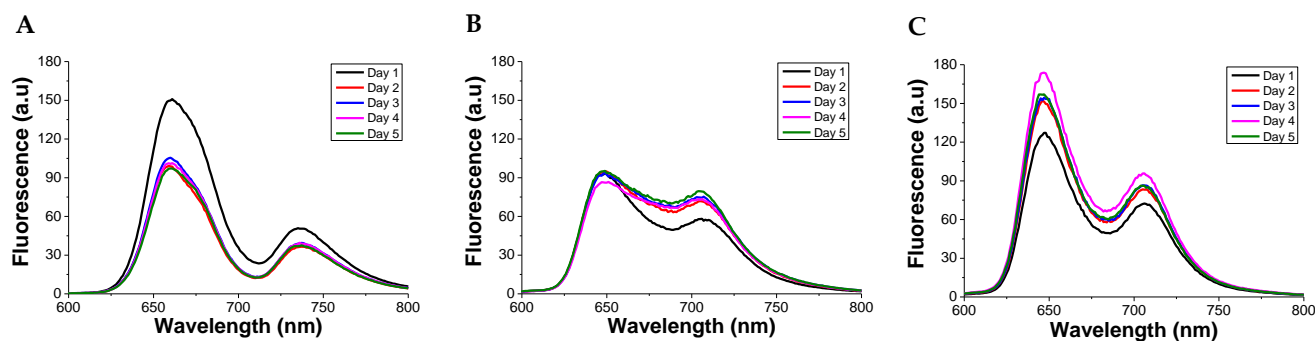

**Figure S11.** Fluorescence spectra of TPPS at a concentration of  $5 \times 10^{-5}$  M and different pH in the presence of PKHEDA  $1 \times 10^{-4}$  M. pHs: (A) 2.92, (B) 6.29, (C) 10.7. Excitation slit 5 nm and emission slit 10 nm. Excitation wavelength 430 nm.

#### Reference.

1. Araya-Hermosilla, E.; Roscam Abbing, M.; Catalán-Toledo, J.; Oyarzun-Ampuero, F.; Pucci, A.; Raffa, P.; Picchioni, F.; Moreno-Villoslada, I. Synthesis of tuneable amphiphilic-modified polyketone polymers, their complexes with 5,10,15,20-tetrakis-(4-sulfonatophenyl)porphyrin, and their role in the photooxidation of 1,3,5-triphenylformazan confined in polymeric nanoparticles. *Polymer* **2019**, *167*, 215–223, doi:<https://doi.org/10.1016/j.polymer.2019.01.079>.
